# Supplementary material for: Effects of School-Based Exercise Program on Obesity and Physical Fitness of Urban Youth: A Quasi-Experiment
Source: MDPI journal article supplement (doi:10.3390/healthcare9030358), 2021-03-22
Supplement: s1 [file s1]

## PAPS: 5 Health Factors (12 elective methods)

### <Cardiopulmonary Evaluation>

- ① Shuttle-run (PACER)
- ② Distance runs or walks
- ③ Step tests

### <Flexibility>

- ④ Sit-and-reach
- ⑤ Whole body flexibility

### <Muscular Strength and Endurance>

- ⑥ Push-ups
- ⑦ Sit-up
- ⑧ Grip strength

### <Quickness>

- ⑨ 50m run
- ⑩ Standing long jumping

### <Body Composition>

- ⑪ Body Mass Index
- ⑫ %Fat

[PACER] (unit: repetition) \*4th~6th: 15m, 7th~12th: 20m

Male

| Grade | Very Poor<br>(5등급) | Poor<br>(4등급) | Fair<br>(3등급) | Good<br>(2등급) | Excellent<br>(1등급) |
|-------|--------------------|---------------|---------------|---------------|--------------------|
| 4th   | 19~25              | 26~44         | 45~68         | 69~95         | 96~103             |
| 5th   | 22~28              | 29~49         | 50~72         | 73~99         | 100~107            |
| 6th   | 22~31              | 32~53         | 54~77         | 78~103        | 104~112            |
| 7th   | 15~19              | 20~35         | 36~49         | 50~63         | 64~73              |
| 8th   | 15~21              | 22~37         | 38~51         | 52~65         | 66~75              |
| 9th   | 16~23              | 24~39         | 40~53         | 54~67         | 68~79              |
| 10th  | 16~25              | 26~41         | 42~55         | 56~69         | 70~80              |
| 11th  | 16~27              | 28~43         | 44~57         | 58~71         | 72~81              |
| 12th  | 18~29              | 30~45         | 46~59         | 60~73         | 74~82              |

Female

| Grade | Very Poor<br>(5등급) | Poor<br>(4등급) | Fair<br>(3등급) | Good<br>(2등급) | Excellent<br>(1등급) |
|-------|--------------------|---------------|---------------|---------------|--------------------|
| 4th   | 16~20              | 21~39         | 40~56         | 57~76         | 77~100             |
| 5th   | 18~22              | 23~44         | 45~62         | 63~84         | 85~104             |
| 6th   | 20~24              | 25~49         | 50~68         | 69~92         | 93~112             |
| 7th   | 10~13              | 14~18         | 19~24         | 25~34         | 35~70              |
| 8th   | 10~14              | 15~20         | 21~28         | 29~39         | 40~75              |
| 9th   | 12~15              | 16~22         | 23~32         | 33~44         | 45~80              |
| 10th  | 13~16              | 17~24         | 25~36         | 37~49         | 50~85              |
| 11th  | 14~17              | 18~26         | 27~40         | 41~54         | 55~90              |
| 12th  | 14~17              | 18~26         | 27~40         | 41~54         | 55~90              |

[Distance runs or walks] (unit: sec)

\*5<sup>th</sup>~6<sup>th</sup>: 1000m, Female: 1200m, Male: 1600m

Male

| Grade | Very Poor<br>(5등급) | Poor<br>(4등급) | Fair<br>(3등급) | Good<br>(2등급) | Excellent<br>(1등급) |
|-------|--------------------|---------------|---------------|---------------|--------------------|
| 5th   | 480~640            | 410~479       | 325~409       | 282~324       | 268~281            |
| 6th   | 450~587            | 380~449       | 315~379       | 251~314       | 243~250            |
| 7th   | 700~791            | 600~699       | 503~599       | 426~502       | 400~425            |
| 8th   | 680~774            | 584~679       | 488~583       | 417~487       | 380~416            |
| 9th   | 660~761            | 568~659       | 473~567       | 408~472       | 370~407            |

|      |         |         |         |         |         |
|------|---------|---------|---------|---------|---------|
| 10th | 640~755 | 552~639 | 458~551 | 399~457 | 370~398 |
| 11th | 620~721 | 536~619 | 443~535 | 390~442 | 370~389 |
| 12th | 600~701 | 520~599 | 428~519 | 381~427 | 362~380 |

Female

| Grade | Very Poor<br>(5등급) | Poor<br>(4등급) | Fair<br>(3등급) | Good<br>(2등급) | Excellent<br>(1등급) |
|-------|--------------------|---------------|---------------|---------------|--------------------|
| 5th   | 502~640            | 442~501       | 360~441       | 300~359       | 268~299            |
| 6th   | 480~587            | 430~479       | 354~429       | 300~353       | 243~299            |
| 7th   | 609~661            | 518~608       | 443~517       | 380~442       | 355~379            |
| 8th   | 609~661            | 518~608       | 443~517       | 380~442       | 355~379            |
| 9th   | 609~661            | 518~608       | 443~517       | 380~442       | 355~379            |
| 10th  | 609~661            | 518~608       | 443~517       | 380~442       | 365~379            |
| 11th  | 609~661            | 518~608       | 443~517       | 380~442       | 365~379            |
| 12th  | 609~661            | 518~608       | 443~517       | 380~442       | 365~379            |

[Step test] (unit: PEI)

| Grade | Very Poor<br>(5등급) | Poor<br>(4등급) | Fair<br>(3등급) | Good<br>(2등급) | Excellent<br>(1등급) |
|-------|--------------------|---------------|---------------|---------------|--------------------|
| 전 학년  | 44.0~46.9          | 47.0~51.9     | 52.0~61.9     | 62.0~75.9     | 76.0~95.0          |

[Whole body flexibility] (unit: score)

| Grade      | Very Poor<br>(5등급) | Poor<br>(4등급) | Fair<br>(3등급) | Good<br>(2등급) | Excellent<br>(1등급) |
|------------|--------------------|---------------|---------------|---------------|--------------------|
| All Grades | <4                 | 5             | 6             | 7             | 8                  |

[Sit-and-reach] (unit: cm)

Male

| Grade | Very Poor<br>(5등급) | Poor<br>(4등급) | Fair<br>(3등급) | Good<br>(2등급) | Excellent<br>(1등급) |
|-------|--------------------|---------------|---------------|---------------|--------------------|
| 5th   | -5.1~-4.1          | -4.0~0.9      | 1.0~4.9       | 5.0~7.9       | 8.0~18.0           |
| 6th   | ~5.1~-4.1          | -4.0~0.9      | 1.0~4.9       | 5.0~7.9       | 8.0~18.0           |
| 7th   | -5.1~-4.1          | -4.0~1.9      | 2.0~5.9       | 6.0~9.9       | 10.0~25.0          |
| 8th   | -5.1~-4.1          | -4.0~1.9      | 2.0~6.9       | 7.0~9.9       | 10.0~25.0          |
| 9th   | -5.1~-3.1          | -3.0~2.5      | 2.6~6.9       | 7.0~9.9       | 10.0~25.0          |
| 10th  | -3.1~-2.1          | -2.0~3.9      | 4.0~8.9       | 9.0~12.9      | 13.0~28.0          |
| 11th  | -3.1~0.0           | 0.1~4.9       | 5.0~10.9      | 11.0~15.9     | 16.0~28.0          |
| 12th  | -3.1~0.0           | 0.1~5.9       | 6.0~10.9      | 11.0~15.9     | 16.0~28.0          |

Female

| Grade | Very Poor<br>(5등급) | Poor<br>(4등급) | Fair<br>(3등급) | Good<br>(2등급) | Excellent<br>(1등급) |
|-------|--------------------|---------------|---------------|---------------|--------------------|
| 5th   | -0.1~0.9           | 1.0~4.9       | 5.0~6.9       | 7.0~9.9       | 10.0~22.0          |
| 6th   | -0.1~1.9           | 2.0~4.9       | 5.0~9.9       | 10.0~13.9     | 14.0~26.0          |
| 7th   | -0.1~1.9           | 2.0~7.9       | 8.0~10.9      | 11.0~14.9     | 15.0~28.0          |
| 8th   | -0.1~1.9           | 2.0~7.9       | 8.0~10.9      | 11.0~14.9     | 15.0~28.0          |
| 9th   | -0.1~1.9           | 2.0~7.9       | 8.0~10.9      | 11.0~15.9     | 16.0~28.0          |
| 10th  | -0.1~1.9           | 2.0~7.9       | 8.0~10.9      | 11.0~15.9     | 16.0~28.0          |

|      |          |         |          |           |           |
|------|----------|---------|----------|-----------|-----------|
| 11th | -0.1~4.9 | 5.0~8.9 | 9.0~11.9 | 12.0~16.9 | 17.0~28.0 |
| 12th | -0.1~4.9 | 5.0~8.9 | 9.0~11.9 | 12.0~16.9 | 17.0~28.0 |

### [Push-ups] (unit: repetitions)

Male

| Grade | Very Poor<br>(5등급) | Poor<br>(4등급) | Fair<br>(3등급) | Good<br>(2등급) | Excellent<br>(1등급) |
|-------|--------------------|---------------|---------------|---------------|--------------------|
| 7th   | 0~3                | 4~11          | 12~24         | 25~33         | 34~41              |
| 8th   | 0~3                | 4~11          | 12~24         | 25~33         | 34~41              |
| 9th   | 0~3                | 4~13          | 14~24         | 25~33         | 34~41              |
| 10th  | 2~6                | 7~15          | 16~29         | 30~45         | 46~50              |
| 11th  | 7~10               | 11~24         | 25~41         | 42~49         | 50~54              |
| 12th  | 7~16               | 17~29         | 30~45         | 46~55         | 56~62              |

Female

| Grade | Very Poor<br>(5등급) | Poor<br>(4등급) | Fair<br>(3등급) | Good<br>(2등급) | Excellent<br>(1등급) |
|-------|--------------------|---------------|---------------|---------------|--------------------|
| 7th   | 0~5                | 6~13          | 14~23         | 24~44         | 45~50              |
| 8th   | 0~5                | 6~13          | 14~23         | 24~39         | 40~44              |

|      |     |      |       |       |       |
|------|-----|------|-------|-------|-------|
| 9th  | 0~5 | 6~13 | 14~23 | 24~39 | 40~44 |
| 10th | 0~5 | 6~13 | 14~23 | 24~39 | 40~44 |
| 11th | 0~8 | 9~17 | 18~29 | 30~39 | 40~44 |
| 12th | 0~8 | 9~17 | 18~29 | 30~39 | 40~44 |

[Grip strength] (unit: kg)

Male

| Grade | Very Poor<br>(5등급) | Poor<br>(4등급) | Fair<br>(3등급) | Good<br>(2등급) | Excellent<br>(1등급) |
|-------|--------------------|---------------|---------------|---------------|--------------------|
| 4th   | 16~20              | 21~39         | 40~56         | 57~76         | 77~100             |
| 5th   | 18~22              | 23~44         | 45~62         | 63~84         | 85~104             |
| 6th   | 20~24              | 25~49         | 50~68         | 69~92         | 93~112             |
| 7th   | 10~13              | 14~18         | 19~24         | 25~34         | 35~70              |
| 8th   | 10~14              | 15~20         | 21~28         | 29~39         | 40~75              |



|      |       |       |       |       |       |
|------|-------|-------|-------|-------|-------|
| 9th  | 12~15 | 16~22 | 23~32 | 33~44 | 45~80 |
| 10th | 13~16 | 17~24 | 25~36 | 37~49 | 50~85 |
| 11th | 14~17 | 18~26 | 27~40 | 41~54 | 55~90 |
| 12th | 14~17 | 18~26 | 27~40 | 41~54 | 55~90 |

Female

| Grade | Very Poor<br>(5등급) | Poor<br>(4등급) | Fair<br>(3등급) | Good<br>(2등급) | Excellent<br>(1등급) |
|-------|--------------------|---------------|---------------|---------------|--------------------|
| 4th   | 16~20              | 21~39         | 40~56         | 57~76         | 77~100             |
| 5th   | 18~22              | 23~44         | 45~62         | 63~84         | 85~104             |
| 6th   | 20~24              | 25~49         | 50~68         | 69~92         | 93~112             |
| 7th   | 10~13              | 14~18         | 19~24         | 25~34         | 35~70              |
| 8th   | 10~14              | 15~20         | 21~28         | 29~39         | 40~75              |
| 9th   | 12~15              | 16~22         | 23~32         | 33~44         | 45~80              |
| 10th  | 13~16              | 17~24         | 25~36         | 37~49         | 50~85              |
| 11th  | 14~17              | 18~26         | 27~40         | 41~54         | 55~90              |
| 12th  | 14~17              | 18~26         | 27~40         | 41~54         | 55~90              |

[50m run] (unit: sec)

Male

| Grade | Very Poor<br>(5등급) | Poor<br>(4등급) | Fair<br>(3등급) | Good<br>(2등급) | Excellent<br>(1등급) |
|-------|--------------------|---------------|---------------|---------------|--------------------|
| 4th   | 13.21~16.01        | 10.51~13.20   | 9.71~10.50    | 8.81~9.70     | 8.70~8.80          |
| 5th   | 13.21~15.56        | 10.21~13.20   | 9.41~10.20    | 8.51~9.40     | 8.30~8.50          |
| 6th   | 12.51~15.51        | 10.01~12.50   | 9.11~10.00    | 8.11~9.10     | 7.77~8.10          |
| 7th   | 11.51~12.51        | 9.31~11.50    | 8.41~9.30     | 7.51~8.40     | 7.40~7.50          |
| 8th   | 11.51~12.41        | 9.01~11.50    | 8.21~9.00     | 7.31~8.20     | 7.11~7.30          |
| 9th   | 11.01~12.38        | 8.51~11.00    | 7.81~8.50     | 7.01~7.80     | 6.80~7.00          |
| 10th  | 10.01~10.74        | 8.11~10.00    | 7.61~8.10     | 7.01~7.60     | 6.80~7.00          |
| 11th  | 9.51~9.71          | 7.91~9.50     | 7.51~7.90     | 6.71~7.50     | 6.50~6.70          |
| 12th  | 8.71~9.61          | 7.91~8.70     | 7.51~7.90     | 6.71~7.50     | 6.40~6.70          |

Female

| Grade | Very Poor<br>(5등급) | Poor<br>(4등급) | Fair<br>(3등급) | Good<br>(2등급) | Excellent<br>(1등급) |
|-------|--------------------|---------------|---------------|---------------|--------------------|
| 4th   | 13.31~18.42        | 11.01~13.30   | 10.41~11.00   | 9.41~10.40    | 9.30~9.40          |
| 5th   | 13.01~15.91        | 10.71~13.00   | 9.91~10.70    | 8.91~9.90     | 8.73~8.90          |
| 6th   | 12.91~15.01        | 10.71~12.90   | 9.81~10.70    | 8.91~9.80     | 8.66~8.90          |
| 7th   | 12.21~13.51        | 10.51~12.20   | 9.81~10.50    | 8.81~9.80     | 8.60~8.80          |
| 8th   | 12.21~13.51        | 10.51~12.20   | 9.81~10.50    | 8.81~9.80     | 8.60~8.80          |
| 9th   | 12.21~13.51        | 10.51~12.20   | 9.81~10.50    | 8.81~9.80     | 8.60~8.80          |
| 10th  | 12.21~13.51        | 10.51~12.20   | 9.81~10.50    | 8.81~9.80     | 8.60~8.80          |
| 11th  | 12.21~13.51        | 10.51~12.20   | 9.51~10.50    | 8.81~9.50     | 8.60~8.80          |

|      |             |             |            |           |           |
|------|-------------|-------------|------------|-----------|-----------|
| 12th | 12.21~13.51 | 10.51~12.20 | 9.51~10.50 | 8.81~9.50 | 8.60~8.80 |
|------|-------------|-------------|------------|-----------|-----------|

[Standing long jumping] (unit: cm)

Male

| Grade | Very Poor<br>(5등급) | Poor<br>(4등급) | Fair<br>(3등급) | Good<br>(2등급) | Excellent<br>(1등급) |
|-------|--------------------|---------------|---------------|---------------|--------------------|
| 4th   | 98.2~100           | 100.1~130     | 130.1~149     | 149.1~170     | 170.1~179.4        |
| 5th   | 105.6~111          | 111.1~141     | 141.1~159     | 159.1~180     | 180.1~187.4        |
| 6th   | 112.0~122          | 122.1~148     | 148.1~167     | 167.1~200     | 200.1~204.7        |
| 7th   | 122.9~131          | 131.1~159     | 159.1~177     | 177.1~211     | 211.1~219.7        |
| 8th   | 129.9~136          | 136.1~169     | 169.1~187     | 187.1~218     | 218.1~229.3        |
| 9th   | 141.4~145          | 145.1~180     | 180.1~201     | 201.1~238     | 238.1~244.0        |
| 10th  | 139.9~160          | 160.1~195     | 195.1~216     | 216.1~255     | 255.1~260.2        |
| 11th  | 162.9~177          | 177.1~212     | 212.1~228     | 228.1~258     | 258.1~270.0        |
| 12th  | 169.9~185          | 185.1~221     | 221.1~243     | 243.1~264     | 264.1~277.1        |

Female

| Grade | Very Poor<br>(5등급) | Poor<br>(4등급) | Fair<br>(3등급) | Good<br>(2등급) | Excellent<br>(1등급) |
|-------|--------------------|---------------|---------------|---------------|--------------------|
| 4th   | 87.4~97            | 97.1~119      | 119.1~135     | 135.1~161     | 161.1~165.5        |
| 5th   | 89.3~100           | 100.1~123     | 123.1~139     | 139.1~170     | 170.1~175.0        |

|      |          |           |           |           |             |
|------|----------|-----------|-----------|-----------|-------------|
| 6th  | 89.9~100 | 100.1~127 | 127.1~144 | 144.1~175 | 175.1~177.8 |
| 7th  | 89.9~100 | 100.1~127 | 127.1~144 | 144.1~175 | 175.1~180.5 |
| 8th  | 93.9~100 | 100.1~127 | 127.1~145 | 145.1~183 | 183.1~198.0 |
| 9th  | 94.9~100 | 100.1~127 | 127.1~145 | 145.1~183 | 183.1~198.0 |
| 10th | 94.9~100 | 100.1~139 | 139.1~159 | 159.1~186 | 186.1~200.0 |
| 11th | 94.9~100 | 100.1~139 | 139.1~159 | 159.1~186 | 186.1~200.0 |
| 12th | 94.9~100 | 100.1~139 | 139.1~159 | 159.1~186 | 186.1~200.0 |

### [Body Mass Index] (unit: kg/m<sup>2</sup>)

Male

| Grade | Lean  | Normal    | Overweight | Mild Obesity | Severe Obesity |
|-------|-------|-----------|------------|--------------|----------------|
| 4th   | <14.0 | 14.1~20.1 | 20.2~22.3  | 22.4~32.3    | 32.4이상         |
| 5th   | <14.3 | 14.4~20.9 | 21.0~23.3  | 23.4~33.3    | 33.4이상         |
| 6th   | <14.9 | 15.0~21.7 | 21.8~24.0  | 24.1~34.0    | 34.1이상         |
| 7th   | <15.4 | 15.5~22.6 | 22.7~24.7  | 24.8~34.7    | 34.8이상         |
| 8th   | <16.1 | 16.2~23.1 | 23.2~25.6  | 25.7~35.6    | 35.7이상         |
| 9th   | <16.7 | 16.8~23.7 | 23.8~25.9  | 26.0~35.9    | 36.0이상         |
| 10th  | <17.3 | 17.4~23.8 | 23.9~26.0  | 26.1~36.0    | 36.1이상         |
| 11th  | <17.6 | 17.7~23.7 | 23.8~25.9  | 26.0~35.9    | 36.0이상         |
| 12th  | <18.0 | 18.1~23.7 | 23.8~25.5  | 25.6~35.5    | 35.6이상         |

Female

| Grade | Lean  | Normal    | Overweight | Mild Obesity | Severe Obesity |
|-------|-------|-----------|------------|--------------|----------------|
| 4th   | <14.3 | 14.4~21.1 | 21.2~23.7  | 23.8~33.8    | 33.9<          |
| 5th   | <14.6 | 14.7~21.7 | 21.8~24.4  | 24.5~34.5    | 34.6<          |
| 6th   | <15.0 | 15.1~22.3 | 22.4~25.1  | 25.2~35.2    | 35.3<          |
| 7th   | <15.5 | 15.6~22.9 | 23.0~25.7  | 25.8~35.8    | 35.9<          |
| 8th   | <15.9 | 16.0~23.3 | 23.4~26.2  | 26.3~36.3    | 36.4<          |
| 9th   | <16.5 | 16.6~23.7 | 23.8~26.6  | 26.7~36.7    | 36.8<          |
| 10th  | <16.9 | 17.0~24.1 | 24.2~26.8  | 26.9~36.9    | 37.0<          |
| 11th  | <17.4 | 17.5~24.3 | 24.4~26.9  | 27.0~37.0    | 37.1<          |
| 12th  | <17.9 | 18.0~24.5 | 24.6~26.8  | 26.9~36.9    | 37.0<          |

[%Fat] (unit: %)

|        | Lean  | Normal | Overweight | Mild Obesity | Severe Obesity |
|--------|-------|--------|------------|--------------|----------------|
| Male   | <11.9 | 12     | 15         | 25           | 33<            |
| Female | <14.9 | 15     | 27         | 32           | 40<            |
